# Supplementary material for: KIBRA regulates amyloid β metabolism by controlling extracellular vesicles secretion
Source: PubMed Central journal article supplement — eBioMedicine. 2022 Apr 1;78:103980. doi: 10.1016/j.ebiom.2022.103980 (PMC8983338; doi:10.1016/j.ebiom.2022.103980), 2022-04-01

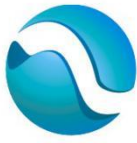

## Cell Line Authentication – STR Profiling Report

Sample Type: Cell Line

Testing Type: STR

Sample code:

Table 1. Sample Code

| Customer's code | Company Code |
|-----------------|--------------|
| HT22            | 20220310-01  |

Sample Number:1

Sample Type: Cell line

Testing Type: STR

Sample From: Shanghai Zhong Qiao Xin Zhou Biotechnology Co.,Ltd.

Testing Method:

DNA was extracted by a commercial kit from CORNING (AP-EMN-BL-GDNA-250G). Twenty short tandem repeat (STR) loci plus the gender determining locus, Amelogenin, were amplified by six multiplex PCR and separated on ABI 3730XL Genetic Analyzer. The signals were then analyzed by the software GeneMapper.

Data Interpretation:

Cell lines were authenticated using Short Tandem Repeat (STR) analysis as described in 2012 in ANSI Standard (ASN-0002) by the ATCC Standards Development Organization (SDO) and in Capes-Davis et al., Match criteria for human cell line authentication: Where do we draw the line? Int J Cancer. 2013;132(11):2510-9.

Test Results:

1. Result

Table 2. Matching information on the cell lines

| Sample Code | Multi-allele | Cell line matched | Cross contamination | EV |
|-------------|--------------|-------------------|---------------------|----|
| 20220310-01 | YES          | Mouse             | /                   | /  |

- Multi-allele means some STR contain more than two loci.

2. Sample Description

20220310-01:

A. The STR results showed that multiple alleles were found in this cell line, and no cross contamination of human cells was found in the cell line.

B. The sample profile is *Mus musculus* (Mouse), No matching cell lines were found in the cell line retrieval. The matching results could not be displayed because relevant STR data information was not entered into the database.

3. Genotyping Result

| Loci | Sample information |                  |         |         | Cell Bank information |                  |                  |
|------|--------------------|------------------|---------|---------|-----------------------|------------------|------------------|
|      | Sample name: HT-22 |                  |         |         | Cell line name: /     |                  |                  |
|      | Allele1            | Allele2          | Allele3 | Allele4 | Allele1               | Allele2          | Allele3          |
| 4-2  | 233.37<br>【19.3】   | 237.42<br>【20.3】 |         |         | 229.37<br>【18.3】      | 233.39<br>【19.3】 | 237.42<br>【20.3】 |

Certificate of STR Analysis

|         |                 |                  |                  |                  |                  |                |                |
|---------|-----------------|------------------|------------------|------------------|------------------|----------------|----------------|
| 5-5     | 335.28<br>【14】  | 347.6<br>【17】    | 351.62<br>【18】   |                  | 331.27<br>【13】   | 335.35<br>【14】 | 339.33<br>【15】 |
| 6-4     | 290.46<br>【16】  | 299.6<br>【18】    |                  |                  | 290.57<br>【15.3】 |                |                |
| 6-7     | 334<br>【12】     | 338.02<br>【13】   | 346.07<br>【15】   |                  | 334<br>【12】      |                |                |
| 9-2     | 220.94<br>【15】  | 233.18<br>【18】   |                  |                  | 220.93<br>【15.1】 | 224.96<br>【16】 |                |
| 12-1    | 229.48<br>【17】  | 241.7<br>【20】    |                  |                  | 241.68<br>【20】   | 245.79<br>【21】 |                |
| 15-3    | 192.5<br>【20.3】 | 196.51<br>【21.3】 | 200.43<br>【22.3】 | 204.66<br>【23.3】 | 192.55<br>【20.3】 |                |                |
| 18-3    | 151.66<br>【16】  | 159.82<br>【18】   |                  |                  | 155.62<br>【17】   | 163.73<br>【19】 |                |
| X-1     | 408.19<br>【27】  | 412.18<br>【28】   |                  |                  | 400.13<br>【25】   |                |                |
| D4S2408 |                 |                  |                  |                  |                  |                |                |

Table 3. STR and Amelogenin Genotyping Results of Cell line 20220310-01

*The allele match algorithm compares the 8 core loci plus amelogenin only, even though alleles from all loci will be reported when available.*

**Others:**



### 1. Genotyping Strategy and Site Distribution

Attached Table. Experimental Strategy and Sites

|          | Strategy 1 | Strategy 2   |
|----------|------------|--------------|
| <b>1</b> | 18-3(FAM)  | 12-1(FAM)    |
| <b>2</b> | 4-2 (FAM)  | 5-5(FAM)     |
| <b>3</b> | 6-7(FAM)   | X-1(FAM)     |
| <b>4</b> | 9-2(NED)   | 15-3(NED)    |
| <b>5</b> |            | 6-4(NED)     |
| <b>6</b> |            | D4S2408(NED) |

2. DSMZ tools was used to carry on the cell line comparison, which contains 2455 cell lines STR data from ATCC, DSMZ, JCRB, ECACC, GNE and RIKEN databases. If the cell is not included in the above cell library, users need to compared with other databases.



中乔新舟  
CELL RESEARCH

### Certificate of STR Analysis

AB Applied Biosystems  
GeneMapper ID v3.2

20220310dhu

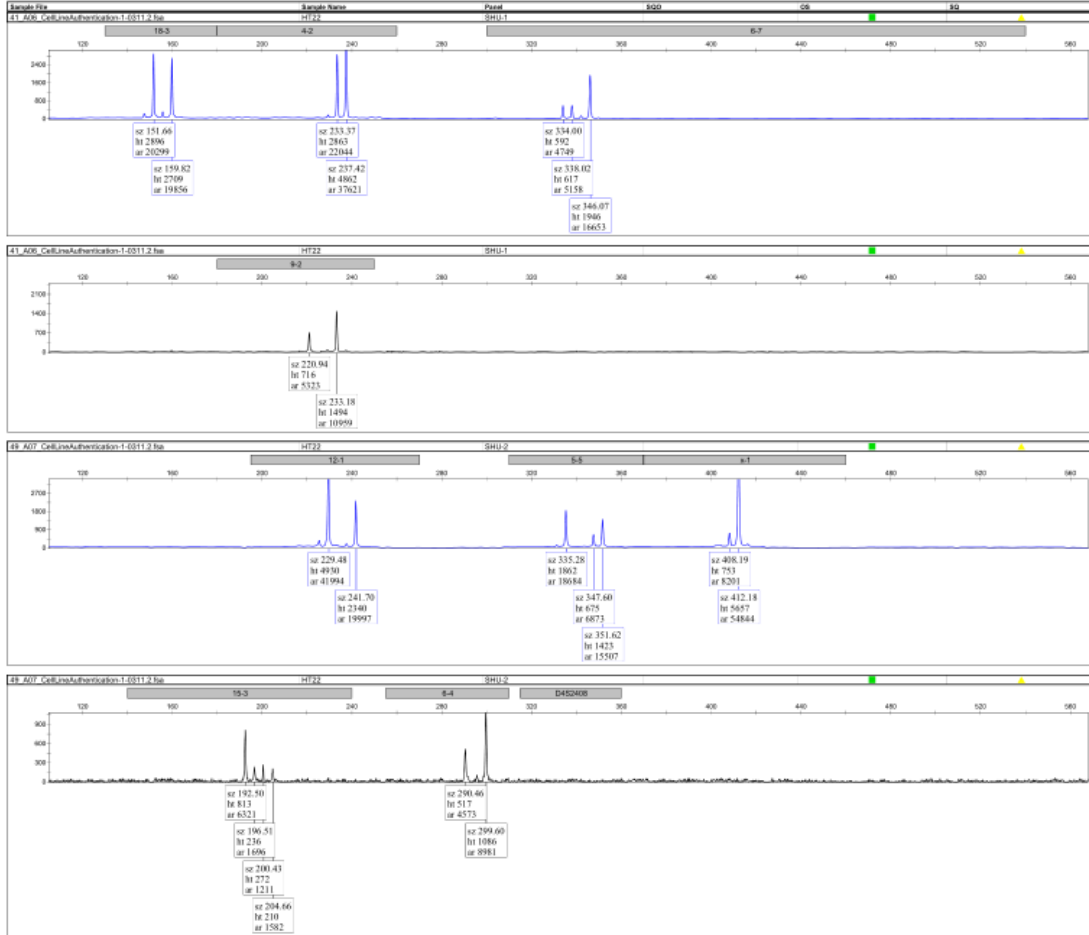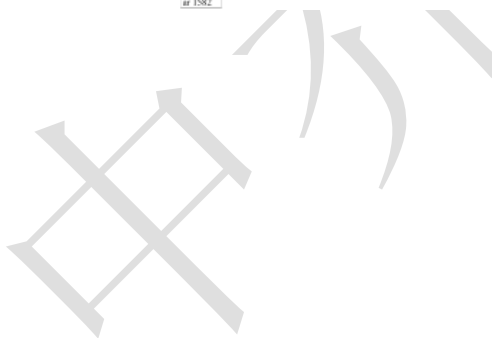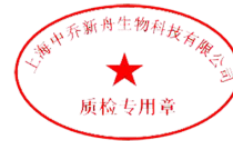

Supplement: mmc3.pdf [file mmc3.pdf]
