# Supplementary material for: KIBRA regulates amyloid β metabolism by controlling extracellular vesicles secretion
Source: PubMed Central journal article supplement — eBioMedicine. 2022 Apr 1;78:103980. doi: 10.1016/j.ebiom.2022.103980 (PMC8983338; doi:10.1016/j.ebiom.2022.103980), 2022-04-01
Supplement: mmc1.pdf [file mmc1.pdf]

## **Antibody validation**

In our current study, we used mouse monoclonal antibodies against KIBRA (clone 2A5), which is gifted from Dong Jixin's lab [1]. This antibody was non-commercial antibodies, so we performed experiments to validate the specificity and reactivity for western blotting according to the methods [2]. Cell culture supernatant (clone 2A5) was used for western blotting.

The HT22 cell line stably overexpressing the mouse KIBRA (referred as KIBRA-Flag cells) were generated by cloning KIBRA into the vector Ubi-MCS-3FLAG-SV40-puromycin. Stably overexpressing cells were selected by 3  $\mu\text{g}/\text{mL}$  puromycin (P8032, Solarbio Science & Technology Co., Ltd., Beijing, China). The stable cell line was maintained in DMEM with 1  $\mu\text{g}/\text{mL}$  puromycin. We examined the expression of KIBRA (clone 2A5) and Flag (Sigma, F1804) by western blotting and found that the result of probing a tagged fusion protein (Flag) with an antibody toward KIBRA produces a detection pattern that is similar to that of the Flag-specific antibody (Fig. 1), thus demonstrating the specificity and reactivity of the antibody under these conditions. In addition, the fragments (about 35 kDa-55 kDa) was also detected by Ab and anti-Flag, which may be the non-specific site.

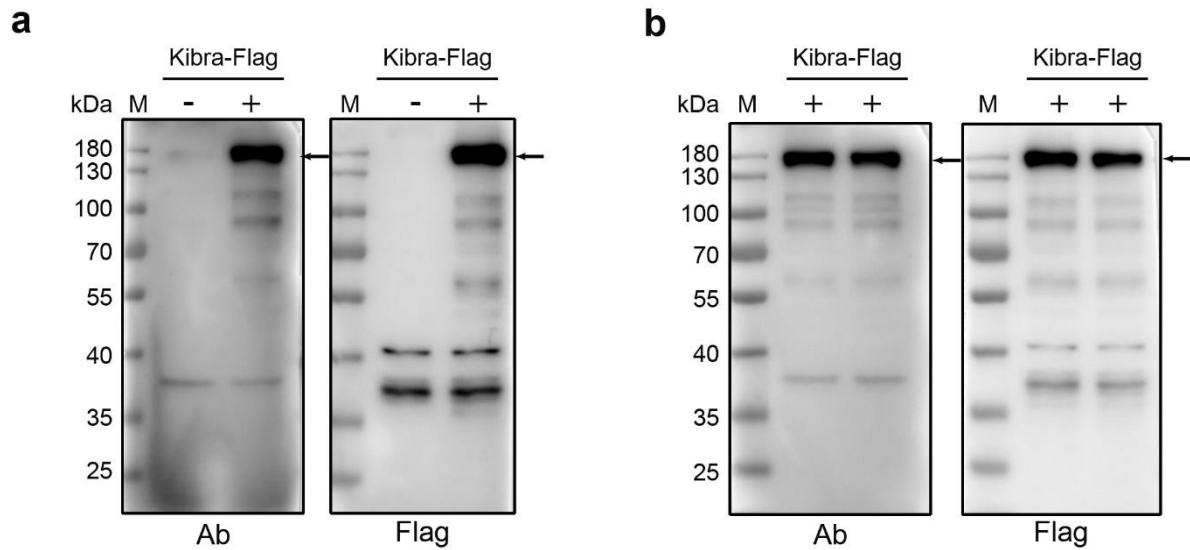

**Fig. 1. Validation of antibodies in western blotting applications.**

(a) A fusion of KIBRA with a peptide Flag was stained with either the antibody to be validated (Ab) or a Flag-specific antibody (Flag) in cell lysates from HT22 cells stably overexpressing either control or KIBRA-Flag. The black arrows indicate the theoretical sizes of the target protein. (b) A fusion of KIBRA with a peptide Flag was stained with either the antibody to be validated (Ab, anti-KIBRA (clone 2A5)) or a Flag-specific antibody (Flag) in cell lysates from KIBRA-Flag cells (Labeled 1-2). The black arrows indicate the theoretical sizes of the target protein.

## Reference

1. Xiao L, Chen Y, Ji M, Volle DJ, Lewis RE, Tsai MY, et al. KIBRA protein phosphorylation is regulated by mitotic kinase aurora and protein phosphatase 1. *J Biol Chem*. 2011;286(42):36304-15.
2. Uhlen M, Bandrowski A, Carr S, Edwards A, Ellenberg J, Lundberg E, et al. A proposal for validation of antibodies. *Nat Methods*. 2016;13(10):823-7.
