# Supplementary material for: KIBRA regulates amyloid β metabolism by controlling extracellular vesicles secretion
Source: PubMed Central journal article supplement — eBioMedicine. 2022 Apr 1;78:103980. doi: 10.1016/j.ebiom.2022.103980 (PMC8983338; doi:10.1016/j.ebiom.2022.103980), 2022-04-01
Supplement: mmc2.pdf [file mmc2.pdf]

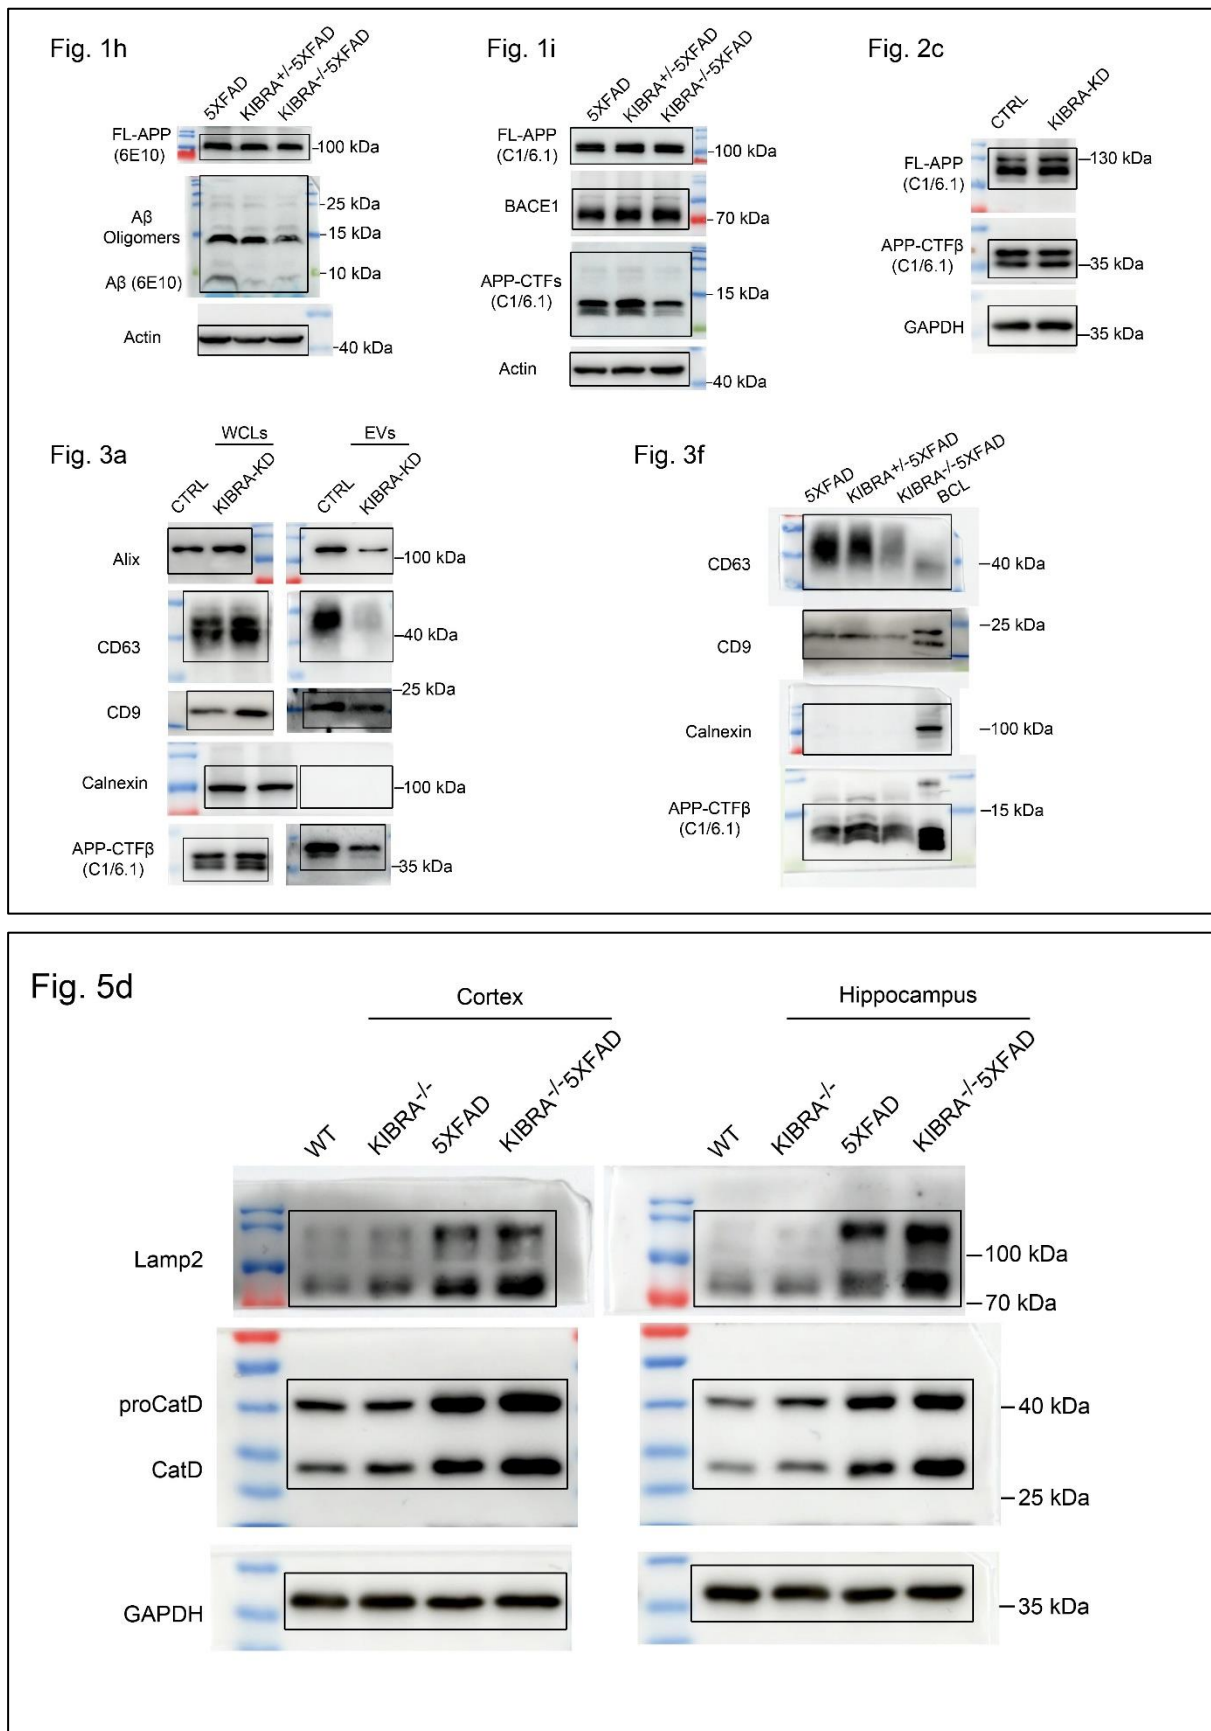

**Fig. 1A. Uncropped Western blots. Full Western blots with indicated areas of selection were presented respectively.**

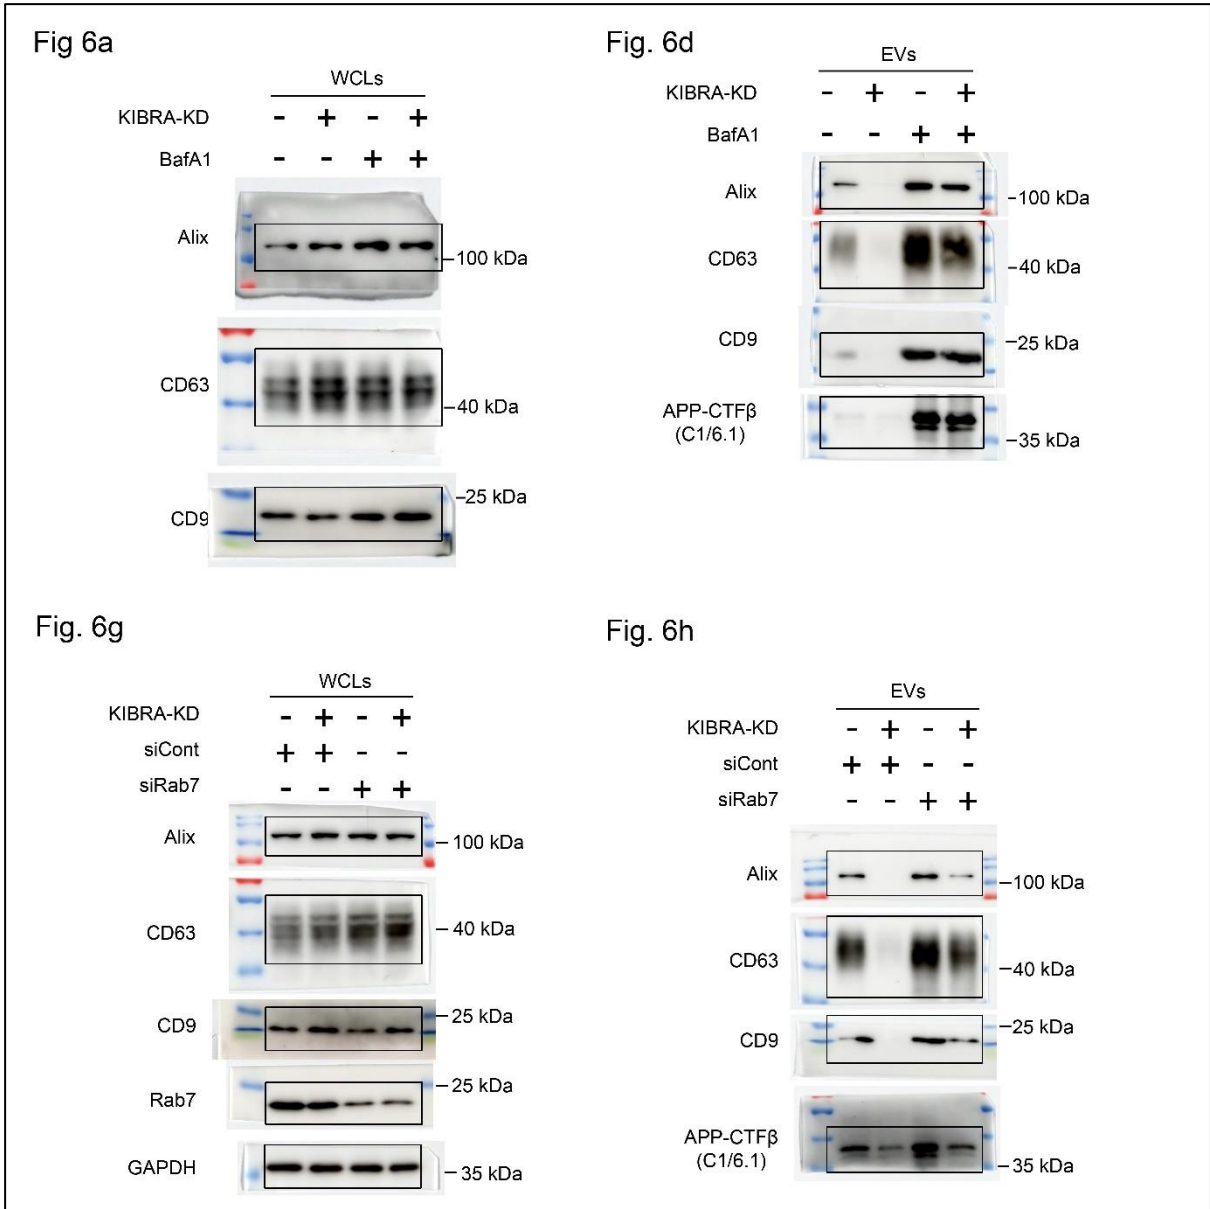

**Fig. 2B. Uncropped Western blots. Full Western blots with indicated areas of selection were presented respectively.**

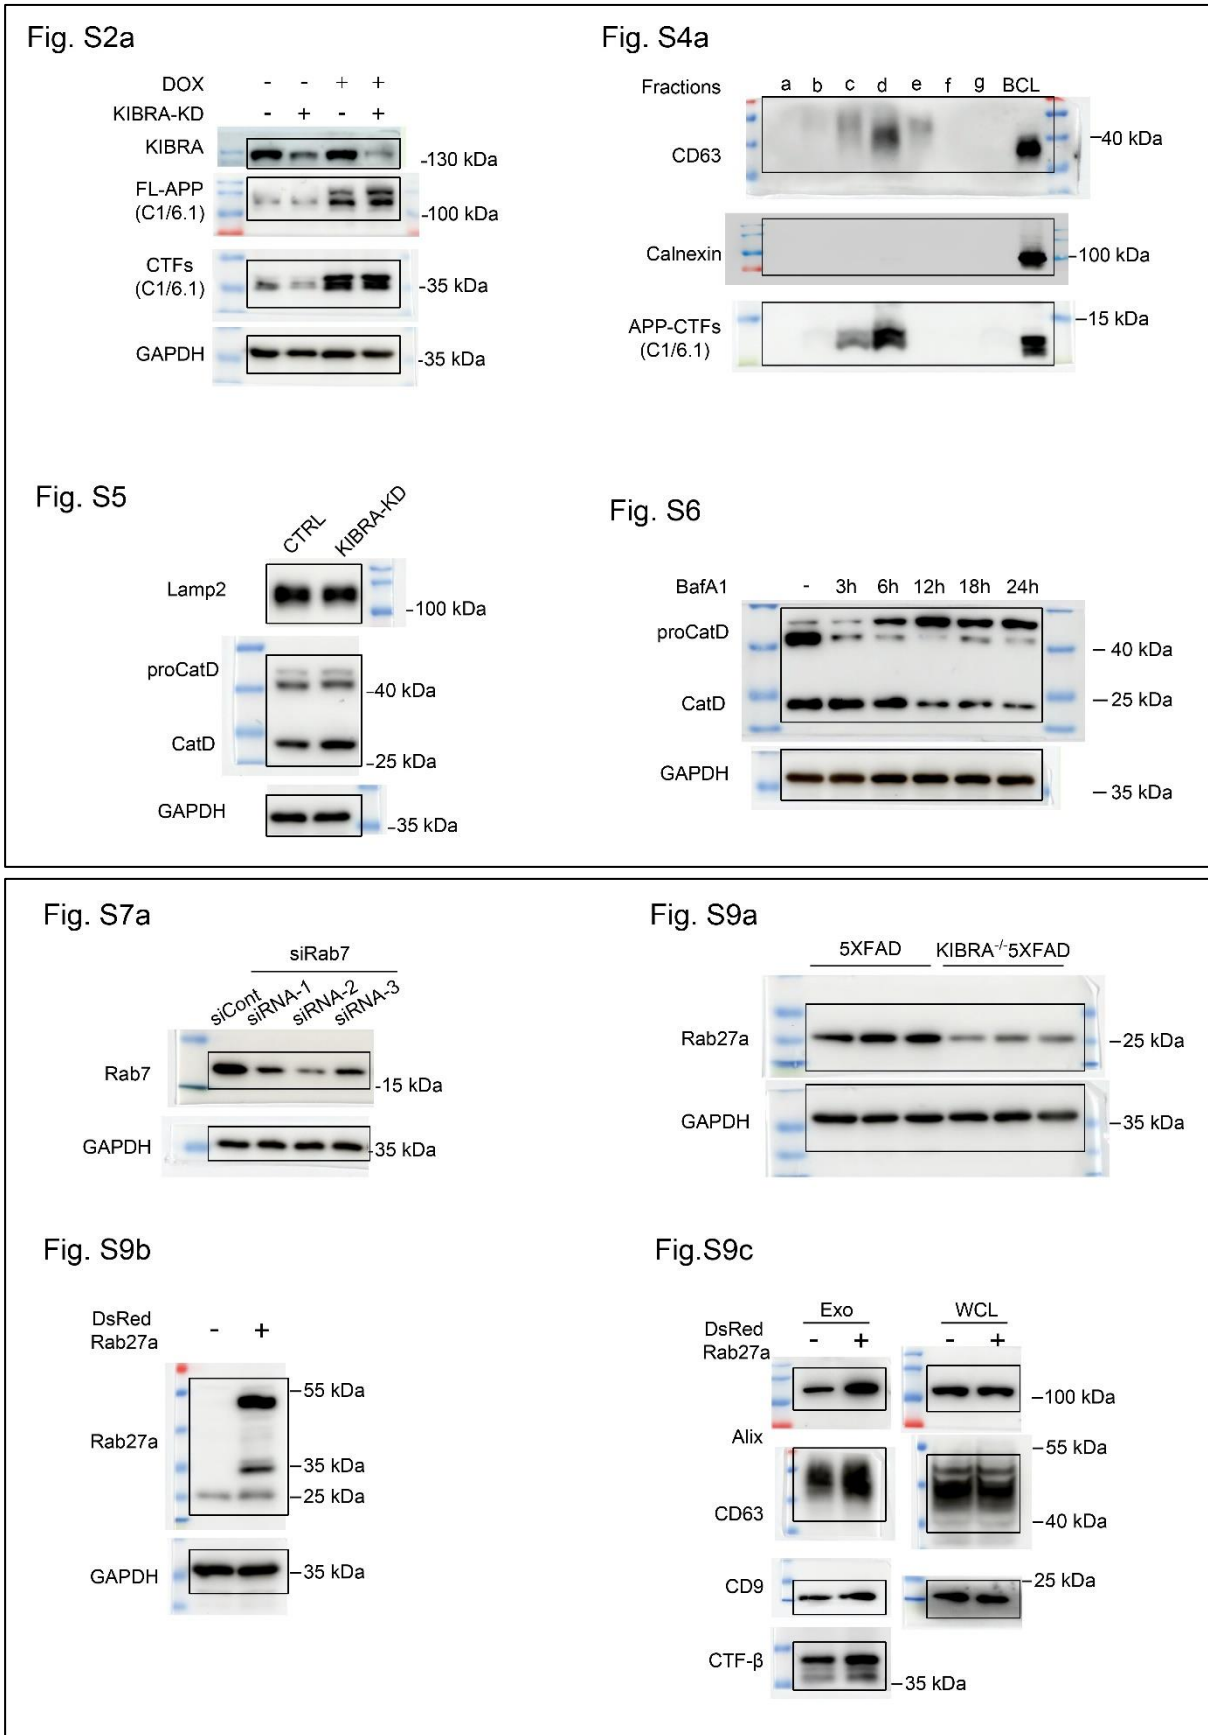

**Fig. 3C. Uncropped Western blots. Full Western blots with indicated areas of selection were presented respectively.**
